# Supplementary material
Source: HighWire-hosted journal article supplement (http://thorax.bmjjournals.com/highwire/filestream/173741/field_highwire_adjunct_files/0/616535online_supplement.pdf)

**Table S1 Benefits of Different Therapies (based on GOLD<sup>[10]</sup>)**

*Pharmacological Therapy*

- Bronchodilators:
  - Short acting inhaled bronchodilators (**Evidence A**)
  - Theophylline (**Evidence B**)
- Systemic corticosteroids (**Evidence A**)
- Antibiotics (**Evidences B and C**)

*Non-Pharmacological Therapy*

- Controlled oxygen therapy (**Evidence A**)
- Assisted mechanical support:
  - Non-invasive ventilation (**Evidence A**)
  - Invasive ventilation (**Evidence A**)
- Pulmonary rehabilitation (**Evidence D**)

**Table S2 Indications for Non-Invasive Ventilation (adapted from GOLD<sup>[10]</sup>)**

- Moderate-to-severe dyspnoea, use of accessory muscles and paradoxical abdominal motion
- Moderate-to-severe acidosis ( $\text{pH} \leq 7.35$ ) and hypercapnia ( $\text{PaCO}_2 > 6.0$  kPa)
- Respiratory frequency  $> 25$  breaths/min

**Indications for Invasive Ventilation**

- Severe dyspnoea, use of accessory muscles and paradoxical abdominal motion
- Respiratory frequency  $> 35$  breaths/min
- Life-threatening hypoxaemia ( $\text{PaO}_2 < 5.3$  kPa or  $\text{PaO}_2/\text{F}_i\text{O}_2 < 27$  kPa)
- Severe acidosis ( $\text{pH} < 7.25$ ) and hypercapnia ( $\text{PaCO}_2 > 8.0$  kPa)
- Respiratory arrest, somnolence and/or impaired mental status
- Cardiovascular complications (hypotension, shock, heart failure)
- Other severe complications (metabolic abnormalities, sepsis, pneumonia, pulmonary embolism)

**Table S3 Indications for Hospitalisation (adapted from GOLD<sup>[10]</sup>)**

- Marked increase in symptoms severity
- Severe COPD background
- Onset of new physical signs (i.e. cyanosis, peripheral oedema)
- Failure of exacerbation to respond to initial pharmacological therapy
- Significant co-morbidities; diagnostic uncertainty
- Poor socioeconomic conditions

**Indications for Intensive Care**

- Severe dyspnoea with inadequate response to initial emergency therapy
- Confusion; lethargy; coma
- Persistent or worsening hypoxaemia ( $\text{PaO}_2 < 5.3 \text{ kPa}$ ), and/or severe-worsening hypercapnia ( $\text{PaCO}_2 > 8.0 \text{ kPa}$ ) and/or severe-worsening respiratory acidosis ( $\text{pH} < 7.25$ ) despite supplemental oxygen therapy or non-invasive ventilation

**Figure S1** Diagram to manage hypoxaemia with supplemental oxygen therapy (OT) in patients with exacerbation of COPD. ABG=arterial blood gases;  $\text{SaO}_2$ =arterial oxygen saturation (adapted from ref 9).

Fig 1

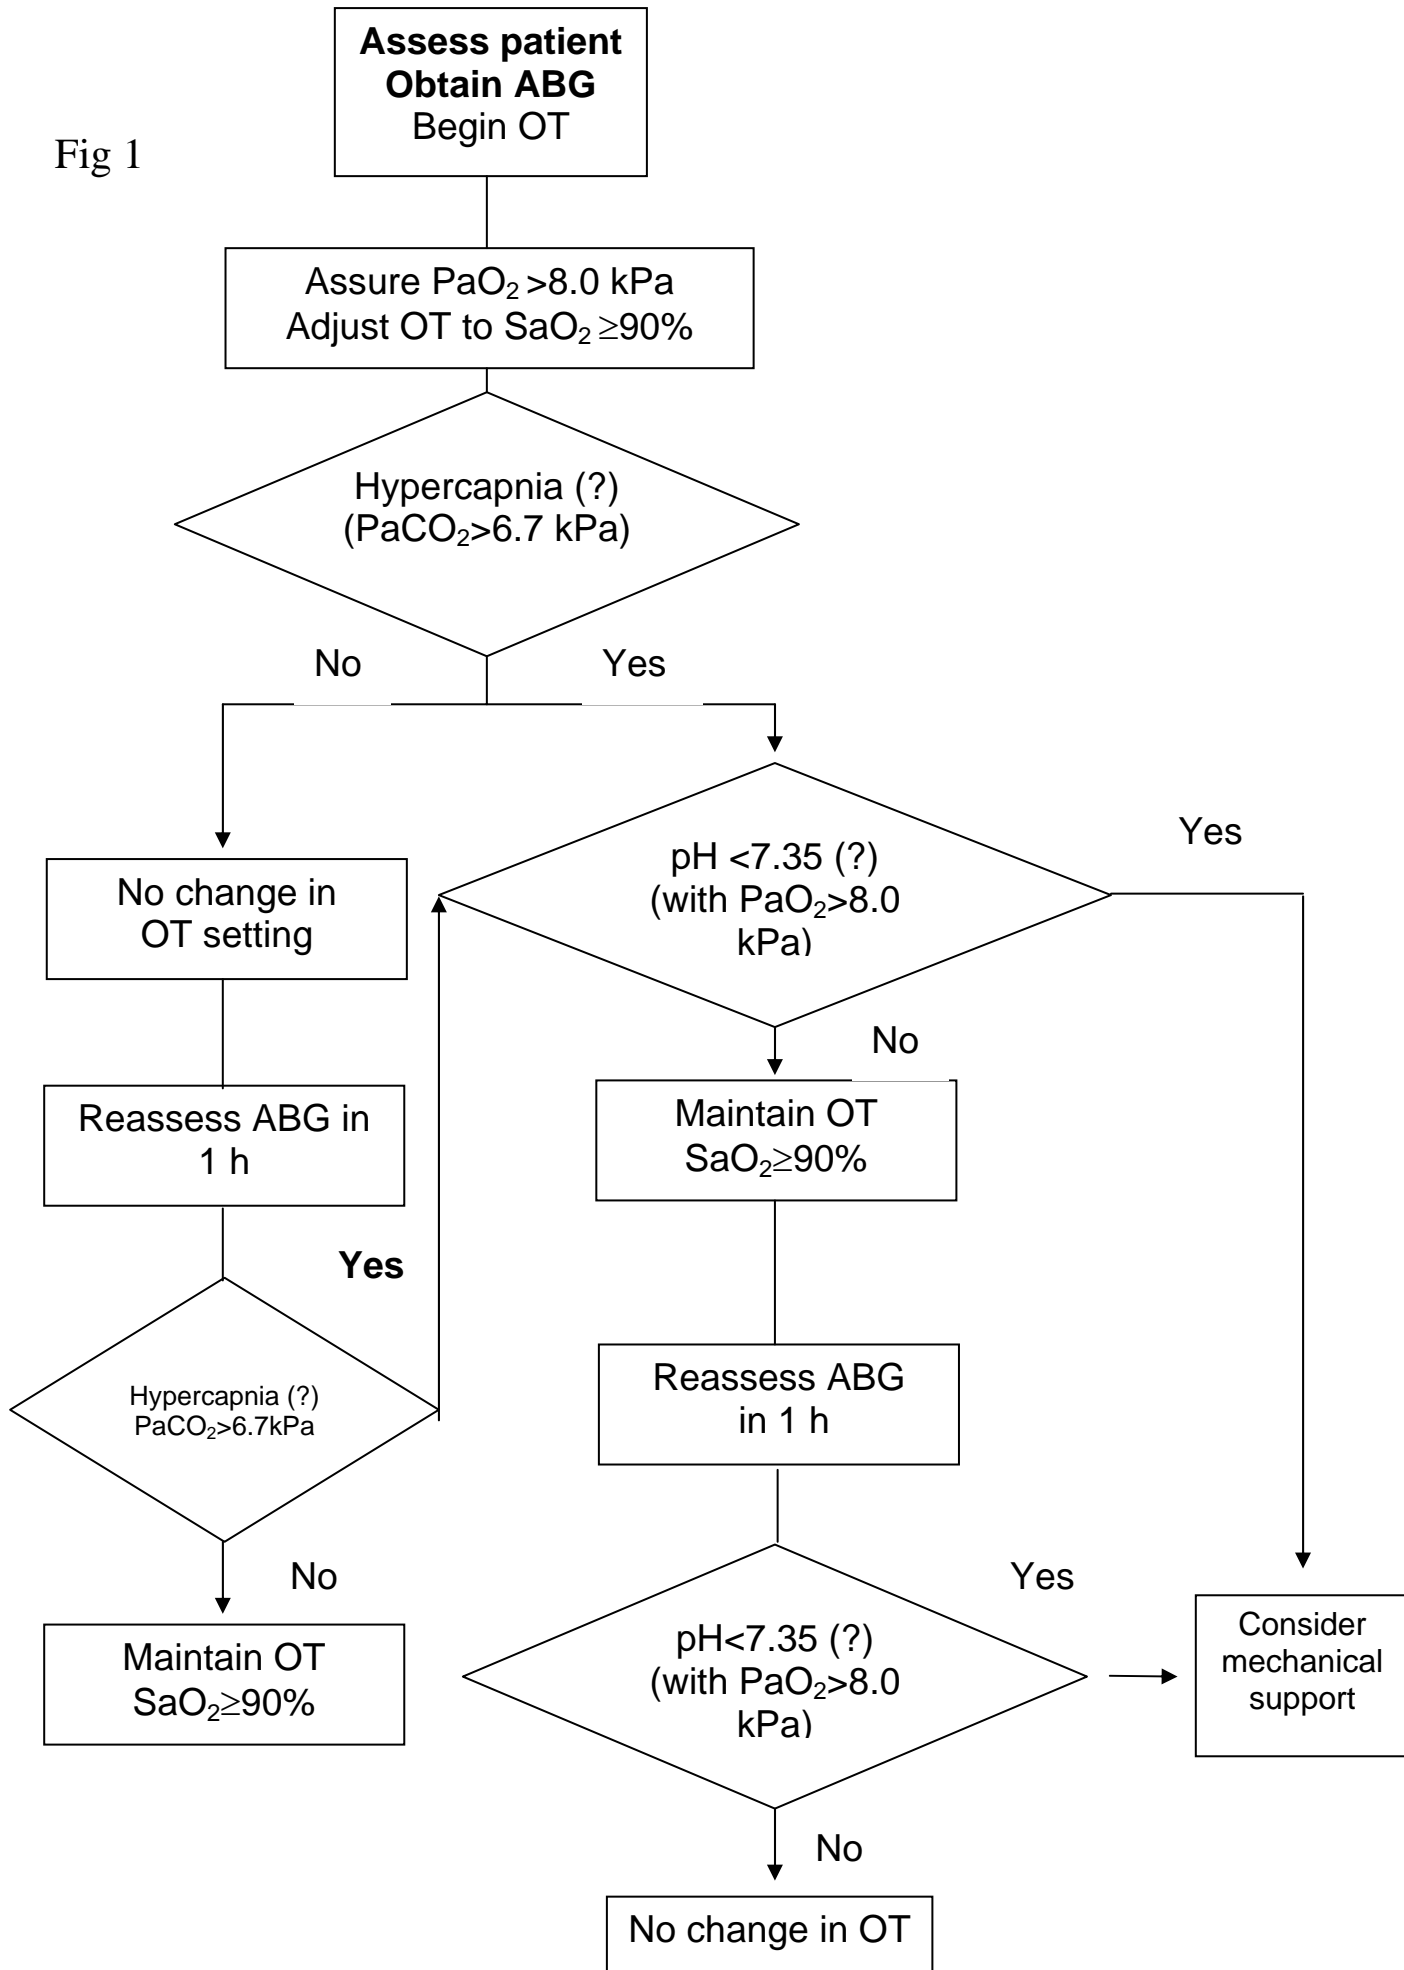

Supplement: 616535online_supplement.pdf [file 616535online_supplement.pdf]
